# Supplementary material for: Synergistic effects of oxygen vacancies and the chelation of tetracycline with metallic ions for enhanced degradation of tetracycline over photocatalysts La2−xKxNiMnO6
Source: Royal Society of Chemistry journal article supplement (doi:10.1039/d0ce01340d), 2020-12-30
Supplement: d0ce01340d1.pdf [file d0ce01340d1.pdf]

## Supplementary Information

**Table S1** The specific dosage of the precursors for different samples.

| Precursors<br>Samples | La(NO <sub>3</sub> ) <sub>3</sub> ·6H <sub>2</sub> O (g) | KNO <sub>3</sub> (g) | Ni(NO <sub>3</sub> ) <sub>2</sub> ·6H <sub>2</sub> O (g) | Mn(NO <sub>3</sub> ) <sub>2</sub> ·4H <sub>2</sub> O (g) |
|-----------------------|----------------------------------------------------------|----------------------|----------------------------------------------------------|----------------------------------------------------------|
| LNMO                  | 3.5533                                                   | 0.0000               | 1.1932                                                   | 1.0299                                                   |
| LKNMO0025             | 3.5270                                                   | 0.0104               | 1.1994                                                   | 1.0352                                                   |
| LKNMO005              | 3.5003                                                   | 0.0210               | 1.2056                                                   | 1.0406                                                   |
| LKNMO0075             | 3.4734                                                   | 0.0316               | 1.2118                                                   | 1.0460                                                   |
| LKNMO010              | 3.4462                                                   | 0.0424               | 1.2182                                                   | 1.0515                                                   |

**Table S2** Lattice parameters of the LKNMO samples obtained from Rietveld analysis.

| sample    | Atom   | x       | y       | z      | occupation | R <sub>wp</sub> | χ <sup>2</sup> |
|-----------|--------|---------|---------|--------|------------|-----------------|----------------|
| LNMO      | La     | 0.2500  | 0.2500  | 0.2500 | 1          | 9.04%           | 1.73           |
|           | /      | /       | /       | /      | /          |                 |                |
|           | Ni     | 0       | 0       | 0      | 0.5        |                 |                |
|           | Mn     | 0       | 0       | 0      | 0.5        |                 |                |
|           | O      | 0.8004  | -0.3004 | 0.2500 | 0.9970     |                 |                |
| LKNMO0025 | Atom   | x       | y       | z      | occupation | R <sub>wp</sub> | χ <sup>2</sup> |
|           | La     | 0.2500  | 0.2500  | 0.2500 | 0.9875     | 8.59%           | 1.22           |
|           | K      | 0.2500  | 0.2500  | 0.2500 | 0.0125     |                 |                |
|           | Ni     | 0       | 0       | 0      | 0.5        |                 |                |
|           | Mn     | 0       | 0       | 0      | 0.5        |                 |                |
| O         | 0.8004 | -0.3004 | 0.2500  | 0.9879 |            |                 |                |
| LKNMO005  | Atom   | x       | y       | z      | occupation | R <sub>wp</sub> | χ <sup>2</sup> |
|           | La     | 0.2500  | 0.2500  | 0.2500 | 0.975      | 10.35%          | 1.38           |
|           | K      | 0.2500  | 0.2500  | 0.2500 | 0.025      |                 |                |
|           | Ni     | 0       | 0       | 0      | 0.5        |                 |                |
|           | Mn     | 0       | 0       | 0      | 0.5        |                 |                |
| O         | 0.8016 | -0.3016 | 0.25    | 0.9775 |            |                 |                |
| LKNMO0075 | Atom   | x       | y       | z      | occupation | R <sub>wp</sub> | χ <sup>2</sup> |
|           | La     | 0.2500  | 0.2500  | 0.2500 | 0.9625     | 9.58%           | 1.25           |
|           | K      | 0.2500  | 0.2500  | 0.2500 | 0.0375     |                 |                |
|           | Ni     | 0       | 0       | 0      | 0.5        |                 |                |
|           | Mn     | 0       | 0       | 0      | 0.5        |                 |                |
| O         | 0.7948 | -0.2948 | 0.2500  | 0.9675 |            |                 |                |
| LKNMO010  | Atom   | x       | y       | z      | occupation | R <sub>wp</sub> | χ <sup>2</sup> |

|    |        |         |        |        |       |      |
|----|--------|---------|--------|--------|-------|------|
| La | 0.2500 | 0.2500  | 0.2500 | 0.95   |       |      |
| K  | 0.2500 | 0.2500  | 0.2500 | 0.05   |       |      |
| Ni | 0      | 0       | 0      | 0.5    | 9.12% | 1.19 |
| Mn | 0      | 0       | 0      | 0.5    |       |      |
| O  | 0.8024 | -0.3024 | 0.2500 | 0.9557 |       |      |

**Table S3** *pH* of catalyst-tetracycline suspension during photodegradation process

| Samples   | LNMO            | LKNMO0025       | LKNMO005        | LKNMO0075       | LKNMO010        |
|-----------|-----------------|-----------------|-----------------|-----------------|-----------------|
| t=-60 min | <i>pH</i> =5.71 | <i>pH</i> =5.72 | <i>pH</i> =5.86 | <i>pH</i> =5.72 | <i>pH</i> =5.83 |
| t=-40 min | <i>pH</i> =5.72 | <i>pH</i> =5.51 | <i>pH</i> =5.58 | <i>pH</i> =5.66 | <i>pH</i> =5.82 |
| t=-20 min | <i>pH</i> =5.75 | <i>pH</i> =5.72 | <i>pH</i> =5.74 | <i>pH</i> =5.77 | <i>pH</i> =5.75 |
| t=0 min   | <i>pH</i> =5.72 | <i>pH</i> =5.80 | <i>pH</i> =5.54 | <i>pH</i> =5.61 | <i>pH</i> =5.73 |
| t=30 min  | <i>pH</i> =5.92 | <i>pH</i> =5.75 | <i>pH</i> =5.61 | <i>pH</i> =5.87 | <i>pH</i> =5.96 |
| t=60 min  | <i>pH</i> =5.94 | <i>pH</i> =5.92 | <i>pH</i> =5.91 | <i>pH</i> =5.93 | <i>pH</i> =5.97 |
| t=90 min  | <i>pH</i> =5.91 | <i>pH</i> =5.95 | <i>pH</i> =6.04 | <i>pH</i> =5.97 | <i>pH</i> =6.13 |
| t=120 min | <i>pH</i> =6.12 | <i>pH</i> =6.14 | <i>pH</i> =6.18 | <i>pH</i> =6.14 | <i>pH</i> =6.38 |
| t=150 min | <i>pH</i> =6.55 | <i>pH</i> =6.54 | <i>pH</i> =6.58 | <i>pH</i> =6.54 | <i>pH</i> =6.53 |
| t=180 min | <i>pH</i> =6.83 | <i>pH</i> =6.75 | <i>pH</i> =6.57 | <i>pH</i> =6.79 | <i>pH</i> =6.71 |
| t=210 min | <i>pH</i> =6.75 | <i>pH</i> =6.84 | <i>pH</i> =6.62 | <i>pH</i> =6.86 | <i>pH</i> =6.71 |
| t=240 min | <i>pH</i> =6.85 | <i>pH</i> =6.84 | <i>pH</i> =6.72 | <i>pH</i> =6.78 | <i>pH</i> =6.84 |
